# Supplementary material for: Supply response on the Hungarian pork sector.
Source: Springer Nature journal article supplement (doi:10.1186/s12885-015-1578-1), 2011-01-01
Supplement: MOESM1 [file 9744946]

## Additional file 1

**Table S1.** International classification of disease (ICD)-9 codes and descriptions of malignancy types.

| Malignancy Type        | ICD-9              | Description                                                                               |
|------------------------|--------------------|-------------------------------------------------------------------------------------------|
| Bone & Soft-tissue     | 170.0 - 170.9      | Malignant neoplasm of bone and articular cartilage                                        |
|                        | 171.0 - 171.9      | Malignant neoplasm of connective and other soft tissue                                    |
|                        | 158.0              | Retroperitoneum                                                                           |
|                        | 203.0              | Multiple Myeloma                                                                          |
| Brain                  | 191.0 - 191.9      | Malignant neoplasm of brain                                                               |
|                        | 192.0 - 192.9      | Malignant neoplasm of other and unspecified parts of Nervous System                       |
| Breast                 | 174.0 - 174.9      | Malignant neoplasm of female breast                                                       |
| Chest & Lung           | 162.0 - 162.9      | Malignant neoplasm of trachea, bronchus and lung                                          |
|                        | 163.0 - 163.9      | Malignant neoplasm of pleura                                                              |
|                        | 164.0 - 164.9      | Malignant neoplasm of thymus, heart and mediastinum                                       |
| Colorectal             | 153.0 - 153.9      | Malignant neoplasm of colon (excludes 153.5, appendix)                                    |
|                        | 154.0 - 154.1      | Malignant neoplasm rectosigmoid junction and rectum                                       |
| Gynecological          | 180.0 - 180.9      | Malignant neoplasm of cervix uteri                                                        |
|                        | 179, 182.0 - 182.2 | Malignant neoplasm of uterus                                                              |
|                        | 183.0 - 183.9      | Malignant neoplasm of ovary and other uterine adnexa                                      |
| Head & Neck            | 140.0 - 140.9      | Malignant neoplasm of lip                                                                 |
|                        | 149.0 - 149.9      | Malignant neoplasm of other and ill-defined sites within the lip, oral cavity and pharynx |
|                        | 160.0 - 160.9      | Malignant neoplasm of nasal cavities, middle ear, and accessory sinuses                   |
|                        | 161.0 - 161.9      | Malignant neoplasm of larynx                                                              |
| Hodgkin Lymphoma       | 201.0 - 201.9      | Hodgkin's disease                                                                         |
| Leukemia               | 204.0 - 204.9      | Lymphoid leukaemia                                                                        |
|                        | 205.0 - 205.9      | Myeloid leukaemia                                                                         |
|                        | 206.0 - 206.9      | Monocytic leukaemia                                                                       |
|                        | 207.0 - 207.9      | Other specified leukaemia                                                                 |
|                        | 208.0 - 208.9      | Leukaemia of unspecified cell type                                                        |
| Melanoma               | 172.0 - 172.9      | Malignant melanoma of skin                                                                |
| Non-Hodgkin's Lymphoma | 200.0 - 200.8      | Lymphosarcoma and reticulosarcoma                                                         |
|                        | 202.0 - 202.9      | Other malignant neoplasm of lymphoid and histiocytic tissue                               |
| Other                  | 154.2              | Anal canal                                                                                |
|                        | 154.3              | Anus, unspecified                                                                         |
|                        | 154.8              | Anus, other                                                                               |
| Testicular             | 186                | Malignant neoplasm of testis                                                              |
| Thyroid                | 193                | Malignant neoplasm of thyroid gland                                                       |
| Upper Gastrointestinal | 150.0 - 150.9      | Malignant neoplasm of oesophagus                                                          |
|                        | 151.0 - 151.9      | Malignant neoplasm of stomach                                                             |
|                        | 152.0 - 152.9      | Malignant neoplasm of small intestine, including duodenum                                 |
|                        | 153.5              | Appendix                                                                                  |
|                        | 155.0 - 155.2      | Malignant neoplasm of liver and intrahepatic bile ducts                                   |
|                        | 156.0 - 156.9      | Malignant neoplasm of gallbladder and extrahepatic bile ducts                             |
|                        | 157.0 - 157.9      | Malignant neoplasm of pancreas                                                            |
| Urologic               | 188.0 - 188.9      | Malignant neoplasm of bladder                                                             |
|                        | 189.0 - 189.9      | Malignant neoplasm of kidney and other and unspecified urinary organs                     |

**Table S2.** Administrative data codes used for identifying evidence of recurrent disease in young adult cancer survivors.

| Criteria           |                    | Database | Codes                                                                                                                                                                                |
|--------------------|--------------------|----------|--------------------------------------------------------------------------------------------------------------------------------------------------------------------------------------|
| Palliative Care    | Family Practise    | OHIP     | A945, C882, C945, K023, W872, W882                                                                                                                                                   |
|                    | Community Medicine | OHIP     | W972, W982                                                                                                                                                                           |
|                    | Anaesthesia        | OHIP     | C982                                                                                                                                                                                 |
| Chemotherapy       |                    | OHIP     | G281, G339, G345, G359, G381, G390                                                                                                                                                   |
| Metastatic Disease | ICD-9              | CIHI     | 196.0, 196.1, 196.2, 196.5, 196.8, 196.9, 197.0, 197.1, 197.2, 197.3, 197.4, 197.5, 197.6, 197.7, 197.8, 198.0, 198.1, 198.2, 198.3, 198.4, 198.5, 198.6, 198.7, 198.8, 199.0, 199.1 |
|                    | ICD-10             | CIHI     | C770, C771, C772, C774, C775, C778, C779, C780, C781, C782, C783, C784, C785, C786, C787, C788, C790, C791, C792, C793, C794, C795, C796, C797, C798                                 |

Abbreviations: OHIP, Ontario Health Insurance Plan; ICD, International Classification of Disease; CIHI, Canadian Institute for Health Information.

**Table S3.** Ontario Health Insurance Plan (OHIP) professional fee codes for plain radiography, nuclear medicine, computed tomography, ultrasound and magnetic resonance imaging studies and effective dose estimates for imaging studies associated with diagnostic radiation used in this study.

| Body Part                                                                                                                | Fee code(s)                                                                                                                              | ED, mSv |
|--------------------------------------------------------------------------------------------------------------------------|------------------------------------------------------------------------------------------------------------------------------------------|---------|
| <b>Plain Radiography</b>                                                                                                 |                                                                                                                                          |         |
| <b>Head and Neck</b>                                                                                                     |                                                                                                                                          |         |
| Skull, facial bones, nose, mandible, sinuses, mastoids, neck, other                                                      | X001, X009, X003, X004, X005, X006, X012, X007, X008, X010, X011, X016, X017, X018, X019, X020                                           | 0.1     |
| <b>Spine and Pelvis</b>                                                                                                  |                                                                                                                                          |         |
| Cervical spine                                                                                                           | X025, X202, X203                                                                                                                         | 0.2     |
| Pelvis and/or hips, 1 view                                                                                               | X036                                                                                                                                     | 0.7     |
| Pelvis and/or hips, 2 views                                                                                              | X037                                                                                                                                     | 1.4     |
| Pelvis and/or hips, 3 views                                                                                              | X038                                                                                                                                     | 2.1     |
| Sacro-iliac joints                                                                                                       | X035, X208                                                                                                                               | 0.83    |
| Thoracic spine                                                                                                           | X027, X204                                                                                                                               | 1       |
| Lumbar or lumbosacral spine, 2 or 3 views                                                                                | X028                                                                                                                                     | 1.5     |
| Lumbar or lumbosacral spine, 4 or 5 views                                                                                | X205                                                                                                                                     | 2       |
| Lumbar or lumbosacral spine, 6 or more views                                                                             | X206                                                                                                                                     | 2       |
| Entire spine (scoliosis series)                                                                                          | X032, X033, X031                                                                                                                         | 2.5     |
| Sacrum and/or coccyx, 2 views                                                                                            | X034                                                                                                                                     | 2       |
| Sacrum and/or coccyx, 3 or more views                                                                                    | X207                                                                                                                                     | 3       |
| <b>Upper Extremities</b>                                                                                                 |                                                                                                                                          |         |
| Clavicle, acromioclavicular joints, sternoclavicular joint, scapula, humerus, elbow, forearm, wrist, hand, finger, thumb | X045, X209, X046, X210, X047, X211, X049, X213, X050, X214, X051, X215, X216, X052, X217, X218, X053, X054, X219, X055, X220, X056, X221 | 0.001   |
| Shoulder                                                                                                                 | X048, X212                                                                                                                               | 0.01    |
| <b>Lower Extremities</b>                                                                                                 |                                                                                                                                          |         |
| Femur (including one joint), tibia, fibula, ankle, calcaneus, foot, toe, leg length studies (orthoroentgenogram)         | X063, X223, X066, X226, X067, X227, X068, X228, X069, X229, X072, X230, X064                                                             | 0.001   |
| Knee including patella                                                                                                   | X065, X224, X225                                                                                                                         | 0.005   |
| Hip (unilateral)                                                                                                         | X060                                                                                                                                     | 0.07    |
| <b>Skeletal Surveys</b>                                                                                                  |                                                                                                                                          |         |
| Survey for bone age (single film), other surveys (e.g. rheumatoid, metabolic, metastatic)                                | X057, X080, X081                                                                                                                         | 3.5     |
| Survey for bone age (2 or more films)                                                                                    | X058                                                                                                                                     | 7       |
| <b>Chest and Abdomen</b>                                                                                                 |                                                                                                                                          |         |
| Chest, single view                                                                                                       | X090                                                                                                                                     | 0.02    |
| 2 views of chest, sternum or thoracic inlet                                                                              | X091, X040, X096                                                                                                                         | 0.1     |
| Chest (3 or more views), ribs                                                                                            | X092, X039                                                                                                                               | 0.2     |
| Abdomen (1 view)                                                                                                         | X100                                                                                                                                     | 0.7     |
| Abdomen (2 or more views)                                                                                                | X101                                                                                                                                     | 1.4     |

|                                                                                                                       |                                                                                          |        |
|-----------------------------------------------------------------------------------------------------------------------|------------------------------------------------------------------------------------------|--------|
| <b>Gastrointestinal Tract</b>                                                                                         |                                                                                          |        |
| T-tube, operative cholangiogram, operative pancreatogram                                                              | X116, X117, X123                                                                         | 4.0    |
| Oesophagus, stomach, duodenum (with double contrast)                                                                  | X103, X109                                                                               | 6.0    |
| Gallbladder (one exam)                                                                                                | X114                                                                                     | 1.0    |
| Gallbladder (with preliminary plain film)                                                                             | X120                                                                                     | 2.0    |
| Oesophagus, stomach, duodenum, small bowel                                                                            | X108, X104, X110, X111                                                                   | 3.0    |
| Colon, barium enema                                                                                                   | X112, X113                                                                               | 7.0    |
| Palatopharyngeal analysis, pharynx, oesophagus                                                                        | X105, X106, X107                                                                         |        |
| <b>Genitourinary Tract</b>                                                                                            |                                                                                          |        |
| Intravenous pyelogram, cystourethrogram, nephrostogram, percutaneous pyleogram, percutaneous nephrostogram            | X130, X135, X131, X191, X138, X139                                                       | 6.0    |
| Retrograde urethrogram, vasogram, cavernosography                                                                     | X134, X136, X141                                                                         | 2.0    |
| Retrograde pyelogram, cystogram                                                                                       | X129, X137                                                                               | 3.0    |
| <b>Obstetrics &amp; Gynaecology</b>                                                                                   |                                                                                          |        |
| Hysterosalpingogram                                                                                                   | X147                                                                                     | 4.0    |
| <b>Fluoroscopy</b>                                                                                                    |                                                                                          |        |
| Chest, skeleton, abdomen                                                                                              | X189, X195, X196, X197                                                                   | 3.0    |
| <b>Bone Mineral Density (BMD) Measurement</b>                                                                         |                                                                                          |        |
| Baseline, second test or subsequent test                                                                              | X145, X146, X152, X153, X142, X148, X149, X155                                           | 0.0013 |
| <b>Special Examinations</b>                                                                                           |                                                                                          |        |
| Selective or non-selective (using film charger) abdominal, thoracic, cervical or cranial angiogram by catheterization | X180, X181, X182                                                                         | 20.0   |
| Abdominal, thoracic, cervical or cranial angiogram by catheterization (single film)                                   | X179                                                                                     | 12.0   |
| Selective (5 or more vessels) abdominal, thoracic, cervical or cranial angiogram by catheterization                   | X140                                                                                     | 40.0   |
| Cholangiogram                                                                                                         | X122                                                                                     | 6.0    |
| Vertebral angiogram - direct puncture or brachial injection                                                           | X132, X133                                                                               |        |
| Cerebral stereotaxis, splenoportogram, arthrogram                                                                     | X162, X121, X198, X199, X156, X200                                                       |        |
| Carotid angiogram by direct puncture                                                                                  | X160, X161                                                                               |        |
| Peripheral angiogram                                                                                                  | X174, X175                                                                               |        |
| Bronchogram                                                                                                           | X158, X159                                                                               |        |
| <b>Miscellaneous Examinations</b>                                                                                     |                                                                                          |        |
| Mammogram, mammary ductography, breast biopsy specimen                                                                | X172, X178, X184, X185, X192, X194, X201                                                 | 0.4    |
| Myelogram -spine and/or posterior fossa                                                                               | X173                                                                                     | 6.0    |
| Other                                                                                                                 | X164, X167, X169, X170, X171, X150, X193, X190, X154, X165, X176, X177, X183, X151, X163 |        |

## **Nuclear Medicine**

### **Cardiovascular System**

|                                                                                                 |                                                                                                                                                |       |
|-------------------------------------------------------------------------------------------------|------------------------------------------------------------------------------------------------------------------------------------------------|-------|
| Venography, cardioangiography, myocardial perfusion scintigraphy, myocardial wall motion, other | J802, J602, J804, J604, J867, J667, J806, J606, J807, J607, J808, J608, J810, J610, J811, J611, J812, J612, J813, J613, J814, J614, J815, J615 | 12.55 |
|-------------------------------------------------------------------------------------------------|------------------------------------------------------------------------------------------------------------------------------------------------|-------|

### **Endocrine System**

|                               |                                                |      |
|-------------------------------|------------------------------------------------|------|
| Adrenal, thyroid scintigraphy | J816, J616, J868, J668, J869, J669, J818, J618 | 4.8  |
| Thyroid scintigraphy          | J871, J671, J817, J617, J870, J670             | 1.9  |
| Parathyroid scintigraphy      | J820, J620                                     | 6.7  |
| Other (with I-131)            | J872, J672                                     | 10.0 |

### **Gastrointestinal System**

|                                                                |                                    |       |
|----------------------------------------------------------------|------------------------------------|-------|
| Schilling Test                                                 | J821, J621, J823, J623             | 0.162 |
| Malabsorption Test                                             | J824, J624, J873, J673             | 0.003 |
| Gastrointestinal (with Cr-52)                                  | J874, J674                         | 0.943 |
| Liver/spleen scintigraphy                                      | J832, J632                         | 2.1   |
| Biliary scintigraphy                                           | J831, J631                         | 3.1   |
| Abdominal scintigraphy for intestinal bleed                    | J830, J630, J878, J678, J879, J679 | 7.8   |
| Calcium Absorption                                             | J826, J626, J875, J675, J827, J627 |       |
| Other gastrointestinal (protein loss, transit or reflux study) | J825, J635, J829, J629             |       |
| Gastro-oesophageal                                             | J876, J676, J877, J677             |       |
| Salivary gland scintigraphy                                    | J833, J633                         |       |

### **Genitourinary System**

|                                                    |                                    |      |
|----------------------------------------------------|------------------------------------|------|
| Dynamic renal imaging or static renal scintigraphy | J834, J634, J836, J636             | 5.18 |
| Computer assessed renal function                   | J835, J635, J880, J680             |      |
| Testicular and scrotal scintigraphy                | J840, J640                         |      |
| Other                                              | J837, J637, J838, J638, J839, J639 |      |

### **Haematopoietic**

|                                           |                        |      |
|-------------------------------------------|------------------------|------|
| Bone marrow scintigraphy                  | J881, J681, J882, J682 | 2.78 |
| In-111 leukocyte scintigraphy             | J883, J683, J884, J684 | 6.7  |
| Plasma volume                             | J841, J641             |      |
| Red cell volume                           | J843, J643             |      |
| Red cell, white cell or platelet survival | J848, J648, J849, J649 |      |
| Other                                     | J847, J647             |      |

### **Musculoskeletal System**

|                      |                        |      |
|----------------------|------------------------|------|
| Bone scintigraphy    | J850, J650, J851, J651 | 6.3  |
| Gallium Scintigraphy | J852, J652, J853, J653 | 15.0 |

### **Nervous System**

|                                                |                                                |      |
|------------------------------------------------|------------------------------------------------|------|
| Cerebral fluid circulation, brain scintigraphy | J857, J657, J885, J685, J886, J686, J858, J658 | 6.88 |
|------------------------------------------------|------------------------------------------------|------|

**Respiratory System**

|                                        |            |     |
|----------------------------------------|------------|-----|
| Ventilation lung scintigraphy          | J887, J687 | 0.5 |
| Perfusion lung scintigraphy            | J859, J659 | 2.0 |
| Perfusion and ventilation scintigraphy | J860, J660 | 2.5 |

**Miscellaneous**

|                                                                                 |                                                |      |
|---------------------------------------------------------------------------------|------------------------------------------------|------|
| Scintomammography                                                               | J863, J663                                     | 6.66 |
| Radionuclide lymphangiogram, ocular tumour localization, tear duct scintigraphy | J861, J661, J862, J662, J864, J664, J865, J665 |      |

**Computed Tomography**

|                                                                                                                           |                        |      |
|---------------------------------------------------------------------------------------------------------------------------|------------------------|------|
| CT guidance of biopsy                                                                                                     | X168                   | 30.0 |
| Abdomen with and without IV contrast, pelvis with and without IV contrast                                                 | X126, X233             | 17.6 |
| Cardio-thoracic CT (also known as CT angiography)                                                                         | X235                   | 15.0 |
| Thorax with and without IV contrast                                                                                       | X125                   | 14.0 |
| Spine with and without IV contrast                                                                                        | X128                   | 11.8 |
| Abdomen with IV contrast, abdomen without IV contrast, pelvis with IV contrast, pelvis without IV contrast                | X409, X410, X231, X232 | 8.8  |
| Thorax without IV contrast, thorax with IV contrast                                                                       | X406, X407             | 7.0  |
| Neck with IV contrast                                                                                                     | X404                   | 6.0  |
| Spine without IV contrast, spine with IV contrast                                                                         | X415, X416             | 5.9  |
| Head with IV contrast, complex head with and without IV contrast                                                          | X401, X408             | 4.0  |
| Neck with and without IV contrast, neck without IV contrast                                                               | X124, X403             | 3.0  |
| Head with and without IV contrast, head without contrast, complex head with IV contrast, complex head without IV contrast | X188, X400, X402, X405 | 2.0  |
| Extremities                                                                                                               | X127, X412, X413       |      |
| CT perfusion                                                                                                              | E874                   |      |
| CT colonography                                                                                                           | X234                   |      |

### ***Diagnostic Ultrasound***

|                                             |                                                                           |
|---------------------------------------------|---------------------------------------------------------------------------|
| Head and Neck                               | J122, J422, J102, J402, J103, J403,<br>J107, J407, J108, J408, J105, J405 |
| Pelvis                                      | J162, J462, J138, J438, J165, J476,<br>J163, J463                         |
| Extra-cranial vessel assessment             | J190, J490, J191, J491, J192, J492,<br>J201, J501                         |
| Peripheral vessel assessment                | J193, J493, J194, J494, J195, J495,<br>J202, J502                         |
| Thorax, Abdomen and Retroperitoneum         | J125, J425, J135, J435, J128, J428                                        |
| Intracavitary                               | J161, J461, J164, J464                                                    |
| Echography                                  | J180, J480                                                                |
| Extremities                                 | J182, J482                                                                |
| Breast                                      | J127, J427                                                                |
| Scotal                                      | J183, J483                                                                |
| Transcranial                                | J189, J489                                                                |
| Venous Assessment                           | J198, J498                                                                |
| Doppler evaluation of organ transplantation | J205, J505                                                                |
| Duplex evaluation of portal hypertension    | J206, J506                                                                |
| Duplex assessment of patency obstruction    | J207, J507                                                                |
| Ankle Pressure Measurements                 | J200, J500                                                                |
| Penile pressure recordings                  | J197, J497                                                                |
| Penile Doppler evaluation                   | J199, J499                                                                |
| Transcutaneous tissue                       | J203, J503, J204, J504                                                    |

### ***Magnetic Resonance Imaging***

|             |                  |
|-------------|------------------|
| Head        | X421             |
| Neck        | X431             |
| Thorax      | X441             |
| Breast      | X446             |
| Abdomen     | X451             |
| Pelvis      | X461             |
| Extremities | X471, X488       |
| Spine       | X490, X493, X496 |

Abbreviations: ED, effective dose; I-131, iodine isotope 131; Cr-52, chromium isotope 52; In-111, indium isotope 111; CT, computed tomography.
